# Supplementary material
Source: PubMed Central journal article supplement (PMC7821082)
Supplement: jamaophthalmol-e206331-s001.pdf [file jamaophthalmol-e206331-s001.pdf]

## Supplemental Online Content

Blitzer AL, Ham SA, Colby KA, Skondra D. Association of metformin use with age-related macular degeneration: a case-control study. *JAMA Ophthalmol*. Published online January 21, 2021. doi:10.1001/jamaophthalmol.2020.6331

**eTable 1.** ICD codes, CPT codes, and generic drugs names.

**eFigure 1.** Sample selection flowchart.

**eFigure 2.** Study design.

**eTable 2.** Balance after matching, MarketScan Research Databases 2008-2017.

**eTable 3.** Exposures to metformin, other diabetes medications, and statins over 2 years, MarketScan Research Databases 2008-2017.

**eTable 4.** Exposures to metformin, other diabetes medications, and statins over 2 years among subgroup of diabetes patients (N=81,262 cases, 79,497 controls), MarketScan Research Databases 2008-2017.

**eTable 5.** Models for diabetes patients (N=81,262 cases, 79,497 controls), MarketScan Research Databases 2006-2017.\*

This supplemental material has been provided by the authors to give readers additional information about their work.

eTable 1. ICD codes, CPT codes, and generic drugs names

| Characteristic           | ICD-9 Codes            | ICD-10 Codes                                                                                                                 | CPT Codes                                            | Generic drugs names                                                                                       |
|--------------------------|------------------------|------------------------------------------------------------------------------------------------------------------------------|------------------------------------------------------|-----------------------------------------------------------------------------------------------------------|
| AMD                      | 362.50, 362.51, 362.52 | H35.31, H35.32                                                                                                               |                                                      |                                                                                                           |
| DM                       | 250.xx, 362.0x         | E10.x, E11.x                                                                                                                 |                                                      |                                                                                                           |
| NPDR                     | 362.01, 362.03-362.07  | E10.321, E10.329, E10.331, E10.339, E10.341, E10.349, E11.321, E11.329, E11.331, E11.339, E11.341, E11.349, E11.351, E11.359 |                                                      |                                                                                                           |
| PDR                      | 362.02                 | E10.351, E10.359, E11.351, E11.359                                                                                           |                                                      |                                                                                                           |
| Hyperlipidemia           | 272.xx                 | E78                                                                                                                          |                                                      |                                                                                                           |
| Hypertension             | 401.xx- 404.xx         | I10-I15                                                                                                                      |                                                      |                                                                                                           |
| Smoking                  | 305.1x                 | F17, O99.33, Z71.6, Z72.0, Z87.891                                                                                           |                                                      |                                                                                                           |
| Eye exam visits          |                        |                                                                                                                              | 92002, 92004, 92012, 92014, 99201-99205, 99211-99215 |                                                                                                           |
| Sulfonylureas            |                        |                                                                                                                              |                                                      | glimepiride, glyburide, glipizide, tolazamide, tolbutamide, chlorpropamide                                |
| Glitazones               |                        |                                                                                                                              |                                                      | Rosiglitazone, pioglitazone                                                                               |
| Meglitinides             |                        |                                                                                                                              |                                                      | repaglinide, nateglinide                                                                                  |
| Other antidiabetic drugs |                        |                                                                                                                              |                                                      | exenatide, sitagliptin, pramlintide                                                                       |
| Statin                   |                        |                                                                                                                              |                                                      | lovastatin, fluvastatin, pravastatin, rosuvastatin, atorvastatin, pitavastatin, simvastatin, cerivastatin |

**eFigure 1.** Sample selection flowchart.

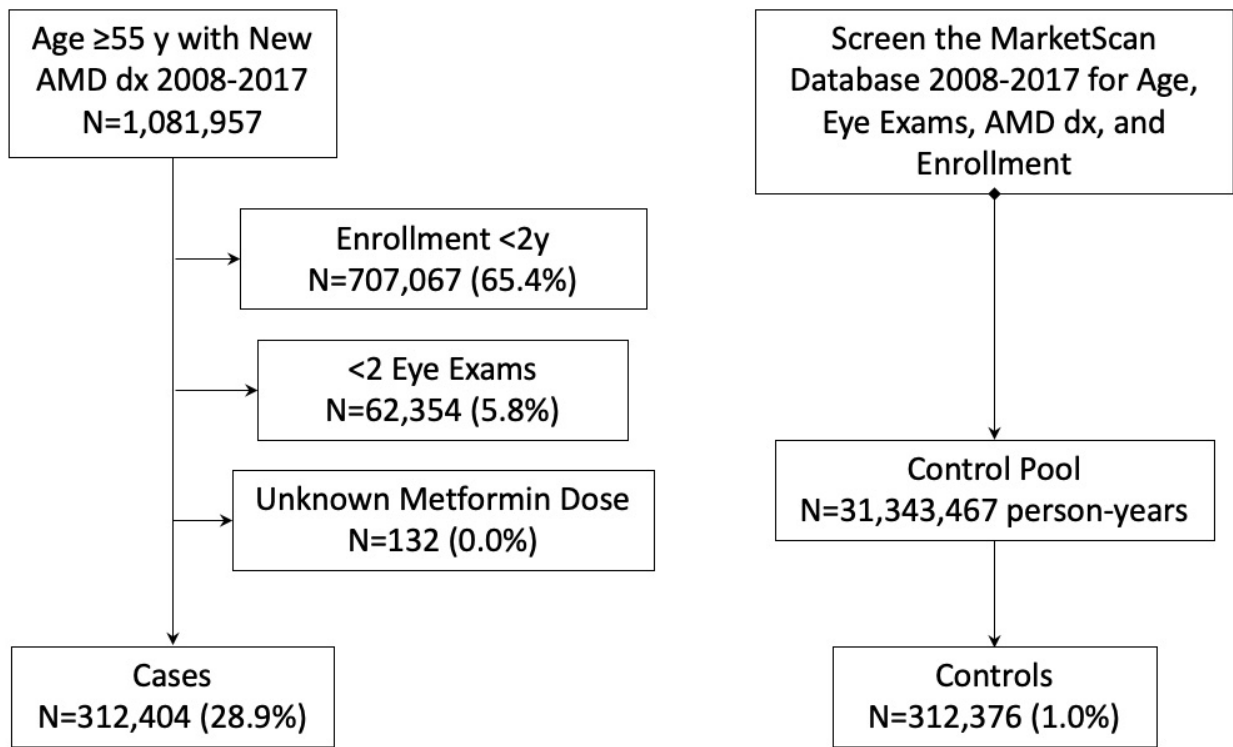

**eFigure 2.** Study design.

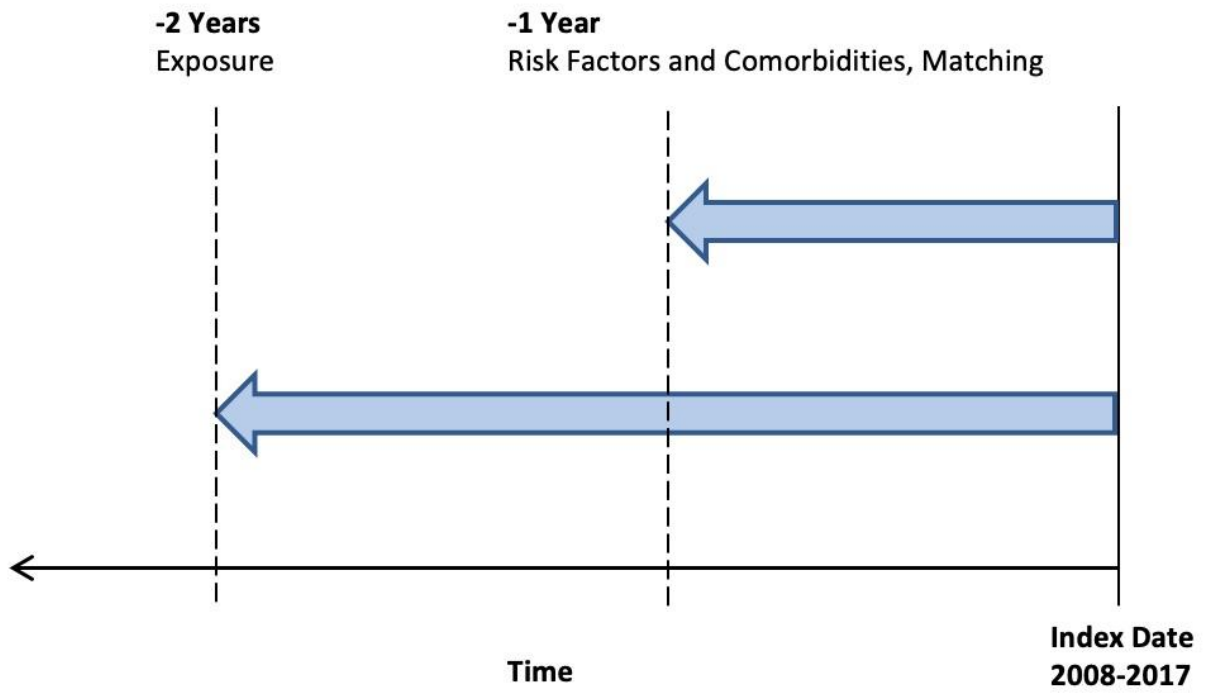

eTable 2. Balance after matching, MarketScan Research Databases 2008-2017.

|                       | <b>Cases<br/>(N=312,404)</b> | <b>Controls<br/>(N=312,376)</b> |                                 |
|-----------------------|------------------------------|---------------------------------|---------------------------------|
| <b>Characteristic</b> | <b>Mean (SD)</b>             | <b>Mean (SD)</b>                | <b>Standardized Difference*</b> |
| Age                   |                              |                                 |                                 |
| 55-64                 | 0.21 (0.41)                  | 0.21 (0.41)                     | 0.0                             |
| 65-74                 | 0.27 (0.45)                  | 0.27 (0.45)                     | 0.0                             |
| 75-84                 | 0.35 (0.48)                  | 0.35 (0.48)                     | 0.0                             |
| ≥85                   | 0.17 (0.37)                  | 0.17 (0.37)                     | 0.0                             |
| Mean (SD)             | 74.9 (10.3)                  | 74.9 (10.3)                     | 0.0                             |
| Hypertension          | 0.65 (0.48)                  | 0.65 (0.48)                     | 0.0                             |
| Anemia                | 0.06 (0.25)                  | 0.06 (0.25)                     | 0.0                             |
| Charlson Index        |                              |                                 |                                 |
| 0                     | 0.50 (0.50)                  | 0.50 (0.50)                     | 0.0                             |
| 1                     | 0.20 (0.40)                  | 0.20 (0.40)                     | 0.0                             |
| 2                     | 0.15 (0.36)                  | 0.15 (0.36)                     | 0.0                             |
| ≥3                    | 0.15 (0.36)                  | 0.15 (0.36)                     | 0.0                             |
| Mean (SD)             | 1.10 (1.50)                  | 1.11 (1.51)                     | 0.0                             |
| Region                |                              |                                 |                                 |
| Northeast             | 0.19 (0.40)                  | 0.19 (0.40)                     | 0.0                             |
| North Central         | 0.31 (0.46)                  | 0.31 (0.46)                     | 0.0                             |
| South                 | 0.33 (0.47)                  | 0.33 (0.47)                     | 0.0                             |
| West                  | 0.17 (0.38)                  | 0.17 (0.38)                     | 0.0                             |

\*Standardized difference = difference / pooled SD. Standardized differences <0.25 are considered acceptable.

eTable 3. Exposures to metformin, other diabetes medications, and statins over 2 years, MarketScan Research Databases 2008-2017.

|                                 | <b>Cases</b>       | <b>Controls</b>    |                |
|---------------------------------|--------------------|--------------------|----------------|
|                                 | <b>(N=312,404)</b> | <b>(N=312,376)</b> |                |
| <b>Medication</b>               | <b>N (%)</b>       | <b>N (%)</b>       | <b>P-value</b> |
| Metformin                       | 40,081 (12.8)      | 40,730 (13.0)      | .01            |
| Metformin, g/2 years            |                    |                    | <.001          |
| 0                               | 272,323 (87.2)     | 271,646 (87.0)     |                |
| 1-270                           | 10,141 (3.3)       | 10,754 (3.4)       |                |
| 271-600                         | 9,097 (2.9)        | 9,780 (3.1)        |                |
| 601-1080                        | 11,010 (3.5)       | 11,075 (3.6)       |                |
| >1080                           | 9,833 (3.2)        | 9,121 (2.9)        |                |
| Metformin, g/2 years, mean (SD) | 116 (1403)         | 116 (1579)         | .06            |
| <b>Other medications</b>        |                    |                    |                |
| Insulin                         | 18,257 (5.8)       | 17,383 (5.6)       | <.001          |
| Sulfonureas                     | 25,775 (8.3)       | 26,702 (8.6)       | <.001          |
| Glitazones                      | 9,619 (3.1)        | 9,948 (3.2)        | .02            |
| Meglitinides                    | 1,938 (0.6)        | 1,861 (0.6)        | .21            |
| Other diabetes medications      | 12,089 (3.9)       | 11,262 (3.6)       | <.001          |
| Statins                         | 162,856 (52.1)     | 165,393 (53.0)     | <.001          |

eTable 4. Exposures to metformin, other diabetes medications, and statins over 2 years among subgroup of diabetes patients (N=81,262 cases, 79,497 controls), MarketScan Research Databases 2008-2017.

|                                 | <b>Cases</b>      | <b>Controls</b>   |                |
|---------------------------------|-------------------|-------------------|----------------|
|                                 | <b>(N=81,262)</b> | <b>(N=79,497)</b> |                |
| <b>Medication</b>               | <b>N (%)</b>      | <b>N (%)</b>      | <b>P-value</b> |
| Metformin                       | 38,580 (47.5)     | 38,388 (48.3)     | .001           |
| Metformin, g/2 years            |                   |                   | <.001          |
| 0                               | 42,681 (52.5)     | 41,109 (51.7)     |                |
| 1-270                           | 8,533 (10.5)      | 8,739 (11.0)      |                |
| 271-600                         | 8,440 (10.4)      | 8,881 (11.2)      |                |
| 601-1080                        | 11,119 (13.7)     | 11,069 (13.9)     |                |
| >1080                           | 10,488 (12.9)     | 9,699 (12.2)      |                |
| Metformin, g/2 years, mean (SD) | 433 (2716)        | 436 (3074)        | .14            |
| <b>Other medications</b>        |                   |                   |                |
| Insulin                         | 18,277 (22.5)     | 17,175 (21.6)     | <.001          |
| Sulfonureas                     | 25,509 (31.4)     | 25,919 (32.6)     | <.001          |
| Glitazones                      | 9,863 (12.1)      | 9,958 (12.5)      | .02            |
| Meglitinides                    | 1,982 (2.4)       | 1,858 (2.3)       | .18            |
| Other diabetes medications      | 11,969 (14.7)     | 10,987 (13.8)     | <.001          |
| Statins                         | 57,903 (71.3)     | 56,673 (71.3)     | .88            |

eTable 5. Models for diabetes patients (N=81,262 cases, 79,497 controls), MarketScan Research Databases 2006-2017.\*

| Characteristic             | Univariable models |         | Any metformin     |         | Metformin dose    |         |
|----------------------------|--------------------|---------|-------------------|---------|-------------------|---------|
|                            | OR (CI)            | P-value | OR (CI)           | P-value | OR (CI)           | P-value |
| <b>Risk Factors</b>        |                    |         |                   |         |                   |         |
| Women                      | 0.90 (0.89-0.92)   | <.001   | 1.12 (1.09-1.14)  | <.001   | 1.12 (1.10-1.14)  | <.001   |
| Smoking                    | 1.58 (1.51-1.65)   | <.001   | 1.61 (1.54-1.69)  | <.001   | 1.61 (1.54-1.69)  | <.001   |
| Hyperlipidemia             | 1.13 (1.11-1.16)   | <.001   | 1.12 (1.10-1.15)  | <.001   | 1.12 (1.10-1.15)  | <.001   |
| NPDR                       | 2.26 (2.18-2.34)   | <.001   | 2.28 (2.20-2.37)  | <.001   | 2.28 (2.20-2.36)  | <.001   |
| PDR                        | 1.76 (1.64-1.89)   | <.001   | 1.22 (1.13-1.32)  | <.001   | 1.22 (1.13-1.32)  | <.001   |
| <b>Medications</b>         |                    |         |                   |         |                   |         |
| Metformin                  | 0.95 (0.93-0.97)   | <.001   | 0.95 (0.93-0.97)  | <.001   | ---               |         |
| Metformin Dose, g/2 y      |                    |         |                   |         |                   |         |
| 1-270                      | 0.93 (0.90-0.96)   | <.001   | ---               |         | 0.93 (0.90-0.96)  | <.001   |
| 271-600                    | 0.90 (0.87-0.93)   | <.001   | ---               |         | 0.91 (0.88-0.94)  | <.001   |
| 601-1080                   | 0.96 (0.93-0.98)   | .003    | ---               |         | 0.95 (0.92-0.98)  | .002    |
| >1080                      | 1.02 (0.99-1.05)   | .28     | ---               |         | 1.01 (0.97-1.04)  | .77     |
| Insulin                    | 1.05 (1.03-1.08)   | <.0001  | 0.92 (0.90-0.95)  | <.001   | 0.92 (0.90-0.94)  | <.001   |
| Sulfonureas                | 0.96 (0.94-0.98)   | <.0001  | 0.94 (0.92-0.96)  | <.001   | 0.94 (0.92-0.96)  | <.001   |
| Glitazones                 | 0.98 (0.95-1.01)   | .19     | 0.97 (0.94-1.005) | .09     | 0.97 (0.94-1.000) | .052    |
| Meglitinides               | 1.06 (1.00-1.14)   | .06     | 1.04 (0.97-1.11)  | .30     | 1.03 (0.97-1.10)  | .35     |
| Other diabetes medications | 1.07 (1.04-1.10)   | <.0001  | 1.08 (1.05-1.11)  | <.001   | 1.07 (1.04-1.10)  | <.001   |
| Statins                    | 1.00 (0.98-1.02)   | .83     | 0.98 (0.96-1.00)  | .08     | 0.98 (0.96-1.001) | .06     |
| AIC                        |                    |         | 208,593           |         | 208,573           |         |

\*Stratified by age group, anemia, hypertension, Charlson Index (0, 1, 2, ≥3), region, and year.  
 --- Not applicable.
